# Supplementary material for: Theoretical investigations of ferrocene/ferrocenium solvation in imidazolium-based room-temperature ionic liquids
Source: Royal Society of Chemistry journal article supplement (doi:10.1039/c2cp42876h), 2012-12-14
Supplement: c2cp42876h.pdf [file c2cp42876h.pdf]

# Electronic Supplementary Information for

## Theoretical Investigations of Ferrocene/Ferrocenium Solvation in Imidazolium-Based Room-Temperature Ionic Liquids

Yang Yang\*, Lei Yu

*Department of Chemistry and Biochemistry*

*Rowan University*

*201 Mullica Hill Rd*

*Glassboro, NJ 08028*

\*Corresponding author: [yangy@rowan.edu](mailto:yangy@rowan.edu), 856-256-5461 (tel), 856-256-4478 (fax)

Results of NBO analysis are presented below. Table S1 shows orbital interactions for the Fc—BF<sub>4</sub><sup>-</sup> and Fc<sup>+</sup>—BF<sub>4</sub><sup>-</sup> complexes. Figures S1 and S2 depict the electron density contour maps for the Fc<sup>+</sup>—BF<sub>4</sub><sup>-</sup> complexes.

Table S1. NBO analysis of orbital interactions for the Fc—BF<sub>4</sub><sup>-</sup> and Fc<sup>+</sup>—BF<sub>4</sub><sup>-</sup> complexes.

| Donor                                                 | Acceptor     | E(2) (kcal/mol) |
|-------------------------------------------------------|--------------|-----------------|
| <b>Fc—BF<sub>4</sub><sup>-</sup> side</b>             |              |                 |
| LP(F23)                                               | σ*(C3-H13)   | 0.74            |
| LP(F23)                                               | π*(C2-C3)    | 0.13            |
| LP(F23)                                               | σ*(C4-H14)   | 0.26            |
| LP(F23)                                               | π*(C4-C5)    | 0.10            |
| LP(F24)                                               | σ*(C10-H20)  | 0.73            |
| LP(F24)                                               | π*(C10-C11)  | 0.13            |
| LP(F24)                                               | σ*(C9-H19)   | 0.26            |
| LP(F24)                                               | π*(C8-C9)    | 0.10            |
| LP(F25)                                               | σ*(C9-H19)   | 1.87            |
| LP(F25)                                               | σ*(C4-H14)   | 1.88            |
|                                                       | <b>Total</b> | <b>6.20</b>     |
| <b>Fc<sup>+</sup>—BF<sub>4</sub><sup>-</sup> side</b> |              |                 |
| LP(F23)                                               | σ*(C3-H13)   | 0.76            |
| LP(F23)                                               | π*(C2-C3)    | 0.20            |
| LP(F23)                                               | σ*(C4-H14)   | 0.72            |
| LP(F23)                                               | π*(C4-C5)    | 0.22            |
| LP(F24)                                               | σ*(C3-H13)   | 0.88            |
| LP(F24)                                               | π*(C3-C4)    | 0.04            |
| LP(F24)                                               | σ*(C10-H20)  | 0.94            |
| LP(F24)                                               | π*(C10-C11)  | 0.39            |
| LP(F24)                                               | π*(C8-C9)    | 0.16            |
| LP(F25)                                               | σ*(C4-H14)   | 1.89            |
| LP(F25)                                               | π*(C3-C4)    | 0.06            |
| LP(F25)                                               | σ*(C9-H19)   | 3.98            |
| LP(F25)                                               | π*(C9-C10)   | 0.06            |
|                                                       | <b>Total</b> | <b>10.3</b>     |
| <b>Fc<sup>+</sup>—BF<sub>4</sub><sup>-</sup> top</b>  |              |                 |
| LP(F24)                                               | π*(C2-C3)    | 1.30            |
| LP(F26)                                               | π*(C2-C3)    | 1.30            |
|                                                       | <b>Total</b> | <b>2.60</b>     |

**Note:** For all atom labeling, please refer to Figures 5, 10, and 11 in the main context.

## Figure Captions

**Figure S1.** Electron density contour map for the “side” binding  $\text{Fc}^+—\text{BF}_4^-$  projected on the plane defined by H14, H19, and F25.

**Figure S2.** Electron density contour map for the “top” binding  $\text{Fc}^+—\text{BF}_4^-$  projected on the plane defined by H12, H13, and F24.

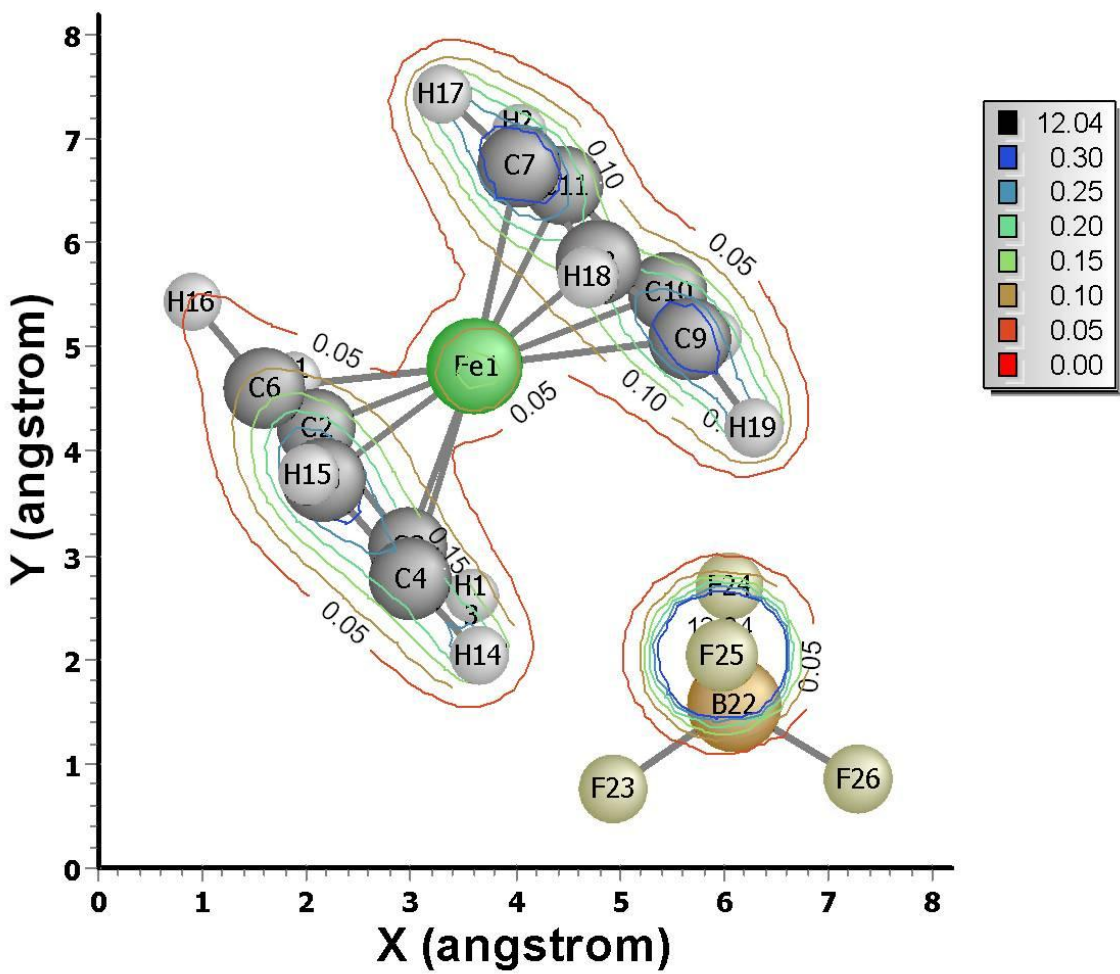

Figure S1

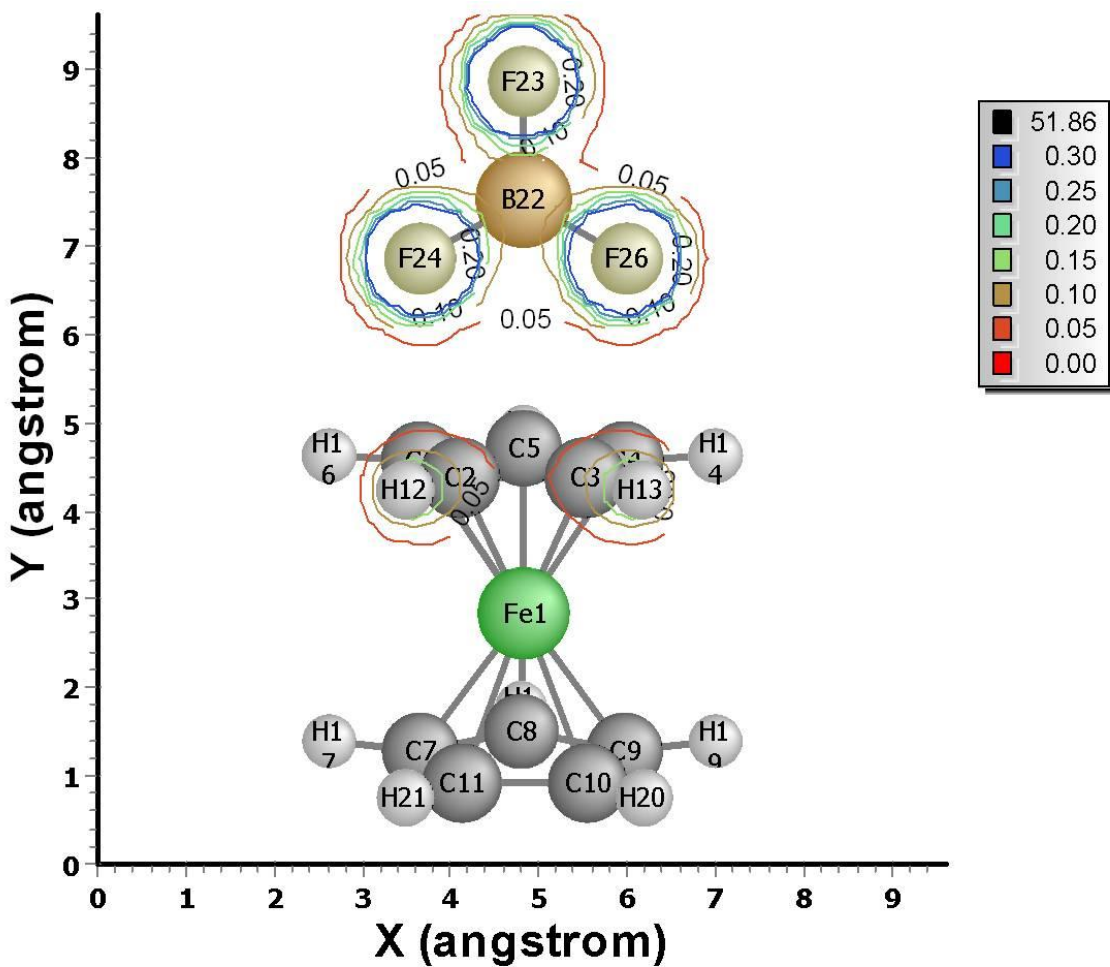

Figure S2
